# Supplementary material for: Systematic mapping of occluded genes by cell fusion reveals prevalence and stability of cis-mediated silencing in somatic cells
Source: HighWire-hosted journal article supplement (doi:10.1101/gr.143891.112), 2013-12-05
Supplement: Figure_S1_RNA-Seq_replicates.pdf [file Figure_S1_RNA-Seq_replicates.pdf]

Figure S1

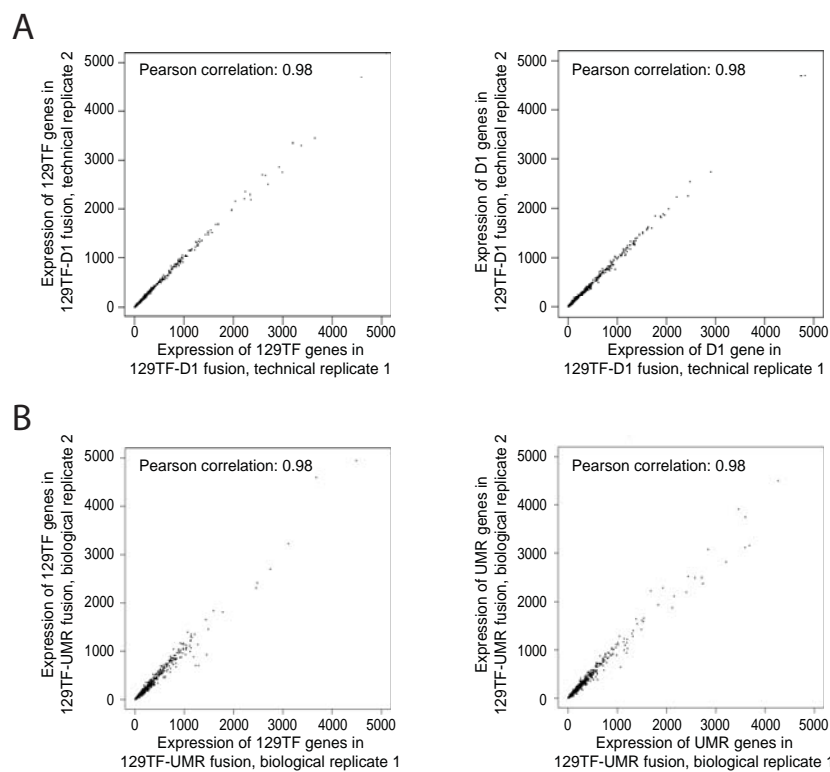

**Figure S1.** High degree of consistency of RNA-seq data in technical and biological replicates. Technical replicates were obtained by sequencing the same sequencing-ready library twice, whereas biological replicates were obtained by performing cell fusion twice followed by RNA-seq of each fusion sample. Expression level is measured in TPG. **A.** Scatter plots of two technical replicates of the 129TF-D1 fusion. In the left (or right) panel, expression of 129TF genes (or D1 genes) in replicate 1 was plotted against replicate 2. **B.** Scatter plots of two biological replicates of the 129TF-UMR fusion. In the left (or right) plot, expression of 129TF genes (or UMR genes) in replicate 1 was plotted against replicate 2.
