# Supplementary material for: Systematic mapping of occluded genes by cell fusion reveals prevalence and stability of cis-mediated silencing in somatic cells
Source: HighWire-hosted journal article supplement (doi:10.1101/gr.143891.112), 2013-12-05
Supplement: Figure_S4_gene_distribution.pdf [file Figure_S4_gene_distribution.pdf]

Figure S4

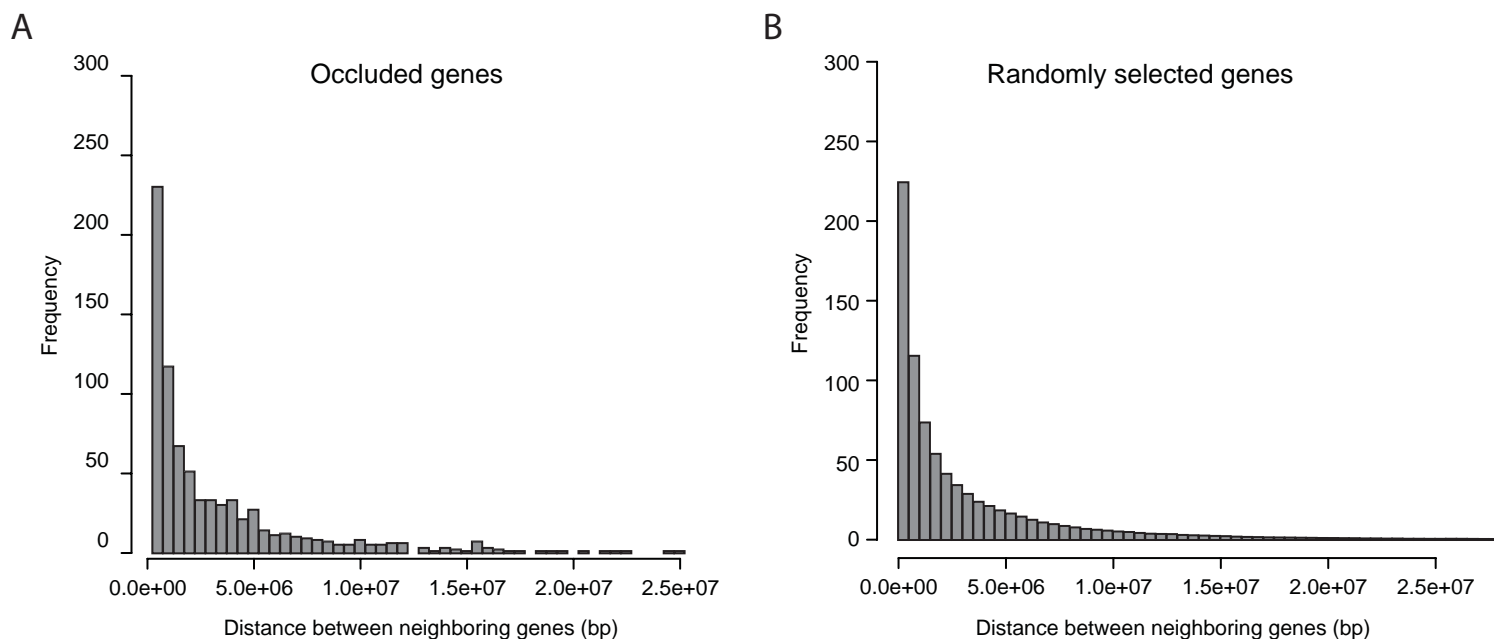

**Figure S4.** Occluded genes appear randomly distributed in the genome. The distribution of distance between neighboring genes for the 790 occluded genes in 129TF (A) is highly similar to the average distribution of distance for 1000 randomly chosen groups of 790 genes per group (B). This is consistent with occluded gene being randomly distributed in the genome. Distance between neighboring genes was calculated based on TSS-to-TSS distance.
