# Supplementary material for: Systematic mapping of occluded genes by cell fusion reveals prevalence and stability of cis-mediated silencing in somatic cells
Source: HighWire-hosted journal article supplement (doi:10.1101/gr.143891.112), 2013-12-05
Supplement: Figure_S5_scatter_plots_of_clones.pdf [file Figure_S5_scatter_plots_of_clones.pdf]

Figure S5

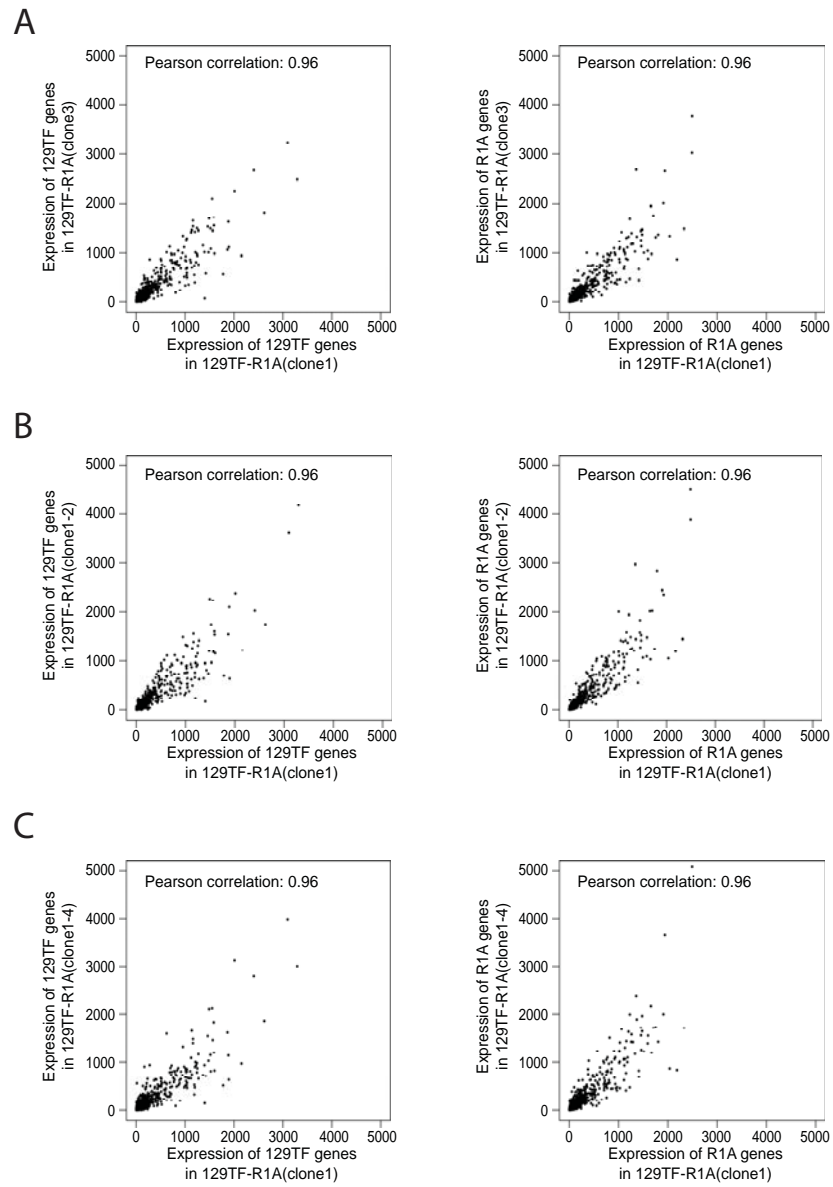

**Figure S5.** Consistency of global gene expression patterns in multiple clones and subclones of the 129TF-R1A fusion. Four clones/subclones are used in the comparison, including 129TF-R1A(clone1) and 129TF-R1A(clone3), which are two primary clones derived from the 129TF-R1A fusion, and 129TF-R1A(clone1-2) and 129TF-R1A(clone1-4), which are two subclones derived from 129TF-R1A(clone1). Expression level is measured in TPG. In panels A-C, expression of 129TF genes (left plot) or R1A genes (right plot) in 129TF-R1A(clone1) is plotted against expression in other clones/subclones.
