# Supplementary material for: Systematic mapping of occluded genes by cell fusion reveals prevalence and stability of cis-mediated silencing in somatic cells
Source: HighWire-hosted journal article supplement (doi:10.1101/gr.143891.112), 2013-12-05
Supplement: Supplemental_Legends.docx [file Supplemental_Legends.docx]

**Figure S1.** High degree of consistency of RNA-seq data in technical and biological replicates. Technical replicates were obtained by sequencing the same sequencing-ready library twice, whereas biological replicates were obtained by performing cell fusion twice followed by RNA-seq of each fusion sample. Expression level is measured in TPG. **A.** Scatter plots of two technical replicates of the 129TF-D1 fusion. In the left (or right) panel, expression of 129TF genes (or D1 genes) in replicate 1 was plotted against replicate 2. **B.** Scatter plots of two biological replicates of the 129TF-UMR fusion. In the left (or right) plot, expression of 129TF genes (or UMR genes) in replicate 1 was plotted against replicate 2.

**Figure S2.** Validation of activatable and occluded genes in 129TF by RT-PCR-seq. For each gene, the rat cell type used to fuse with 129TF is indicated in parentheses below the gene name. Gel images are results of RT-PCR performed on 129TF, its fusion partner, and fused cells between the two. PCR primers were designed to amplify both mouse and rat orthologs but span nucleotide sites that differ between the two cell types. RT-PCR products from fused cells were sequenced, and the chromatograms corresponding to nucleotide sites that differ between 129TF and its fusion partner are shown. The sequence identities of these sites are given above the chromatograms (along with surrounding sequences), with the bottom and top alleles corresponding to 129TF and its fusion partner, respectively. Arrow heads indicate peaks of these sites in the chromatograms. **A.** Activatable genes in 129TF. In fused cells, these genes show expression from both 129TF and its fusion partner. **B.** Occluded genes in 129TF. In fused cells, these genes show no expression from 129TF and only expression from its fusion partner.

**Figure S3.** Bioinformatic chromosome loss analysis indicates that the identification of occluded genes is not an artifact of chromosome loss in fused cells. Graphs were generated by mapping RNA-seq reads to a reference library consisting of the combined mouse-rat genomes. The proportion of these reads mapping to each chromosome was then tallied and displayed as a bar plot. Data from unfused parental cells are presented as a control. All fusion cells contain the full complement of chromosomes from each genome, and the proportion of reads mapping to each chromosome is generally comparable to that of the unfused parental cells. These data indicate that there is no complete loss of a chromosome in any of the fusion samples.

**Figure S4.** Occluded genes appear randomly distributed in the genome. The distribution of distance between neighboring genes for the 790 occluded genes in 129TF (A) is highly similar to the average distribution of distance for 1000 randomly chosen groups of 790 genes per group (B). This is consistent with occluded gene being randomly distributed in the genome. Distance between neighboring genes was calculated based on TSS-to-TSS distance.

**Figure S5.** Consistency of global gene expression patterns in multiple clones and subclones of the 129TF-R1A fusion. Four clones/subclones are used in the comparison, including 129TF-R1A(clone1) and 129TF-R1A(clone3), which are two primary clones derived from the 129TF-R1A fusion, and 129TF-R1A(clone1-2) and 129TF-R1A(clone1-4), which are two subclones derived from 129TF-R1A(clone1) . Expression level is measured in TPG. In panels A-C, expression of 129TF genes (left plot) or R1A genes (right plot) in 129TF-R1A(clone1) is plotted against expression in other clones/subclones.

**Figure S6.** UCSC Genome Browser screenshots of chromatin profiles for representative occluded genes (A-F), activatable genes (G, H), and expressed genes (I, J).

**Figure S7.** Global DNA methylation patterns in 129TF. **A.** Histogram of methylation level of mCG sites. Methylation level is measured by the number of methylcytosine reads divided by the number of total reads at a cytosine site in a CG context (only sites with at least one methylcytosine read and at least 5 total reads are included). **B.** Methylation profile across all chromosomes. Y-axis is mCG density per base pair; X-axis is chromosome positions in base pairs. **C.** Promoter methylation is anti-correlated with expression. Genes are classified based on promoter methylation levels as described in the main text. Expression level is measured in TPG.

**Figure S8.** Effect of AdC treatment on promoter methylation for five representative genes in 129TFxR1A(clone1). Methylation was assessed using bisulfite treatment of genomic DNA followed by PCR to interrogate specific regions and further followed by high-throughput sequencing of PCR products. Three classes of genes are represented, including occluded genes not activated by AdC (A, B), occluded genes activated by AdC (C, D), and activatable genes (E). In each panel, methylation profile for the mouse ortholog is shown on the left and rat on the right. Generally, AdC treatment reduced methylation levels, which persisted even after treated cells were allowed to recover in the absence of AdC. Note that the rat orthologs of these genes remained active in all the samples.

**Figure S9.** Statistics for RNA-seq data analysis. **A.** Histogram of genes based on percent DNA conservation in ORF between mouse-rat orthologs. Genes are from the ortholog reference database we constructed. **B,C.** Percent mouse reads from 129TF (B) or rat reads from B35 (C) discarded due to selection for perfect and unique alignment to the ortholog reference database. **D.** Strong correlation between percent mouse reads discarded and percent rat reads discarded. **E.** Histogram of genes based on expression levels in 129TF. Expression level is measured in TPG.

**Table S1.** Occluded, activatable and extinguished status of 129TF genes in each fusion (“0” means non-informative, “1” means yes).

**Table S2.** List of occluded genes in 129TF.

**Table S3.** List of activatable genes in 129TF.

**Table S4.** List of extinguished genes in 129TF.

**Table S5.** Abundance of putative transcription factor binding sites in promoters of occluded, activatable and expressed genes.

**Table S6.** Occluded genes predicted from chromatin signatures.

**Table S7.** Activatable genes predicted from chromatin signatures.

**Table S8.** Accessions for high-throughput sequencing data.
